# Supplementary material for: Amelioration of Cerebral Ischemic Injury by a Synthetic Seco-nucleoside LMT497
Source: PubMed Central journal article supplement — Exp Neurobiol. 2015 Feb 11;24(1):31–40. doi: 10.5607/en.2015.24.1.31 (PMC4363332; doi:10.5607/en.2015.24.1.31), 2015-02-11
Supplement: en-24-31-s001.pdf [file en-24-31-s001.pdf]

## SUPPLEMENTARY DATA

### Synthesis of LMT497

N<sup>6</sup>-(3-Iodobenzyl)-N-methyl-5-carbamoyladenosine (IB-MECA) as a potent A<sub>3</sub>-receptor agonist was found to show potent in vivo antitumor activity and is now undergoing phase II clinical trials.<sup>1,2</sup> Another A<sub>3</sub>-receptor agonist 2-chloro-N<sup>6</sup>-(3-iodobenzyl)-N-methyl-5-carbamoyladenosine (Cl-IB-MECA) is also being used extensively as a pharmacological tool for studying the A<sub>3</sub>-receptor.<sup>1,2</sup> Based on anti-ischemic activity of IB-MECA and Cl-IB-MECA, their ribose ring opened nucleosides were prepared to examine their anti-ischemic activity (Fig. 1). Novel seco-nucleosides with open ribose ring were tested for in vitro biochemical assays related to cortical neuronal/glial cells and microglial cells. ROS scavenging assay followed by in vivo animal model SD-Rat (male) was also studied.

### Affinity Assay

In Parentheses are indicated the percentage of inhibition of the specific binding for A<sub>1</sub>, A<sub>2A</sub>, A<sub>3</sub>ARs, while for A<sub>2B</sub>ARs in parentheses are shown the percentage of cyclic AMP production respect to NECA 1 μM. The table shows LMT497 did not show affinity to A<sub>3</sub>AR. Compared to Cl-IB-MECA it had very little to no activity. To note, LMT497 did not show affinity for A<sub>1</sub>, A<sub>2A</sub>, or A<sub>2B</sub>ARs either.

### Binding Assay

LMT497 showed an IC<sub>50</sub> (μM) of 310 when observing the ADP-induced platelet in rats *in vitro*. LJ529 and clopidogrel showed an IC<sub>50</sub> (μM) of 190.9 and 139.2 respectively. Requested and done by WhanInPharm. Co, Ltd. Central Research Center.

**Table 1.** Affinity and potency values to Adenosine receptors of LMT497

| Compound   | [ <sup>3</sup> H] CCPA binding<br>hA <sub>1</sub> CHO cells Ki (nM) | [ <sup>3</sup> H]CGS21680 binding<br>hA <sub>2A</sub> CHO cells Ki (nM) | [ <sup>125</sup> I] ABMECA binding<br>hA <sub>3</sub> CHO cells Ki (nM) | cAMP hA <sub>2B</sub> CHO cells<br>EC <sub>50</sub> (nM) |
|------------|---------------------------------------------------------------------|-------------------------------------------------------------------------|-------------------------------------------------------------------------|----------------------------------------------------------|
| LMT497     | >1000 (15%)                                                         | >1000 (17%)                                                             | >1000 (35%)                                                             | >1000 (0%)                                               |
| CL-IB-MECA | 748±62                                                              | 496±38                                                                  | 1.62±0.13                                                               | >1000 (9%)                                               |
